# Supplementary material for: Sampling of kidneys from cattle and pigs for cadmium analysis
Source: Royal Society of Chemistry journal article supplement (doi:10.1039/b005097k), 2001-01-01
Supplement: figure.pdf [file figure.pdf]

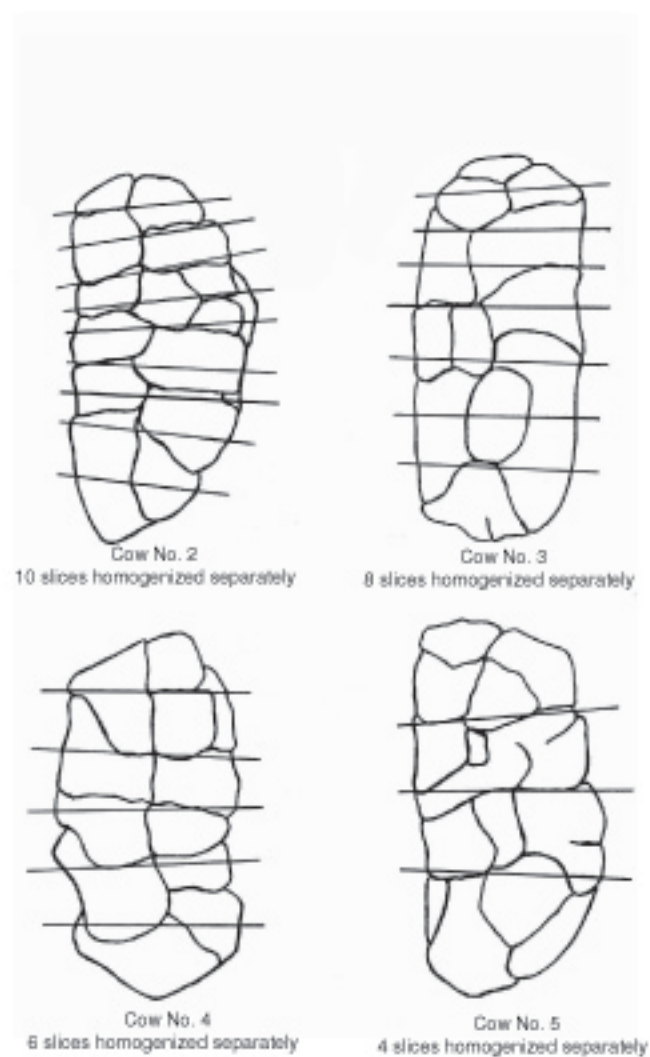

**Fig. S1** Cattle kidneys (cows No. 25) divided into 10, 8, 6 and 4 slices, from which homogenates were made and analysed for cadmium by flame atomic absorption spectrometry after dry-ashing (DA-FAAS).
